# Supplementary material for: An Intelligent Approach to Determine Component Volume Percentages in a Symmetrical Homogeneous Three-Phase Fluid in Scaled Pipe Conditions
Source: MDPI journal article supplement (doi:10.3390/sym15061131), 2023-05-23
Supplement: s1 [file s1]

**Table S1.** The target data and the trained neural network's output for three categories of training, validation and testing

| output | Gas          |              |                   |                   | Oil          |              |                   |                   |
|--------|--------------|--------------|-------------------|-------------------|--------------|--------------|-------------------|-------------------|
|        | Train target | Train output | Validation target | Validation output | Train target | Train output | Validation target | Validation output |
| 1      | 10           | 8.3142       | 10                | 10.7960           | 20           | 18.0579      | 10                | 8.3162            |
| 2      | 10           | 8.7734       | 10                | 10.0377           | 40           | 38.1052      | 80                | 79.9476           |
| 3      | 10           | 9.8751       | 30                | 31.4235           | 70           | 68.9735      | 20                | 20.4576           |
| 4      | 20           | 21.6797      | 30                | 28.4697           | 30           | 30.8633      | 50                | 50.4275           |
| 5      | 20           | 19.9546      | 30                | 28.6567           | 40           | 38.3123      | 60                | 59.5961           |
| 6      | 20           | 20.1203      | 10                | 10.1294           | 50           | 50.6642      | 70                | 71.5008           |
| 7      | 20           | 20.4309      | 20                | 20.6362           | 60           | 59.6782      | 40                | 41.1505           |
| 8      | 20           | 18.4432      | 20                | 18.5041           | 70           | 71.2665      | 60                | 60.0999           |
| 9      | 30           | 28.9972      | 30                | 31.5979           | 10           | 10.0367      | 50                | 48.4363           |
| 10     | 30           | 31.2165      | 40                | 40.5383           | 30           | 30.0393      | 50                | 48.3234           |
| 11     | 40           | 39.2108      | 60                | 59.6449           | 10           | 11.4477      | 20                | 20.8505           |
| 12     | 40           | 38.2296      | 10                | 8.4017            | 20           | 20.9230      | 10                | 11.2398           |
| 13     | 40           | 41.6035      | 10                | 10.5512           | 30           | 29.8562      | 50                | 51.5923           |
| 14     | 50           | 49.8775      | 20                | 20.4873           | 30           | 28.6153      | 70                | 69.6584           |
| 15     | 50           | 51.8472      | 30                | 30.5902           | 40           | 41.5050      | 40                | 39.9571           |
| 16     | 60           | 59.9545      | 40                | 38.3750           | 10           | 9.6283       | 20                | 20.5493           |
| 17     | 60           | 58.5063      | 40                | 41.8010           | 20           | 21.7017      | 40                | 39.9055           |
| 18     | 60           | 58.0223      | 40                | 40.4112           | 30           | 28.7456      | 50                | 50.3659           |
| 19     | 70           | 69.2962      | 50                | 48.9010           | 10           | 8.2007       | 20                | 20.6737           |
| 20     | 70           | 68.5781      | 70                | 68.6262           | 20           | 20.9175      | 10                | 11.0970           |
| 21     | 80           | 79.9291      | 80                | 78.8522           | 10           | 9.3523       | 10                | 8.6765            |
| 22     | 10           | 8.9471       | 10                | 10.9030           | 10           | 9.8035       | 30                | 29.0248           |
| 23     | 10           | 8.7418       | 20                | 18.6511           | 20           | 19.2970      | 70                | 70.5031           |
| 24     | 10           | 9.0559       | 50                | 49.0030           | 30           | 31.3203      | 10                | 9.0519            |
| 25     | 10           | 10.7854      | 60                | 61.3757           | 40           | 39.3341      | 20                | 19.5897           |
| 26     | 10           | 10.3209      | 20                | 18.4183           | 50           | 49.1514      | 60                | 58.7754           |
| 27     | 10           | 9.0559       | 50                | 49.4523           | 60           | 59.0396      | 10                | 11.4981           |
| 28     | 10           | 10.7083      | 60                | 60.3991           | 80           | 80.0793      | 10                | 9.0325            |
| 29     | 20           | 18.3070      | 70                | 69.4337           | 10           | 8.2234       | 10                | 11.5502           |
| 30     | 20           | 19.0349      | 30                | 31.6021           | 20           | 19.7597      | 50                | 49.7918           |
| 31     | 20           | 19.1372      | 40                | 39.0754           | 30           | 30.7151      | 40                | 40.2153           |
| 32     | 20           | 21.7983      | 70                | 68.7154           | 50           | 51.0958      | 10                | 11.4388           |
| 33     | 20           | 20.5446      | Test target       | Test output       | 70           | 71.0143      | Test target       | Test output       |
| 34     | 30           | 30.9873      | 10                | 8.9279            | 10           | 10.3441      | 30                | 28.6724           |
| 35     | 30           | 31.0922      | 10                | 8.1069            | 20           | 19.5700      | 50                | 49.2897           |
| 36     | 30           | 30.4212      | 10                | 10.2207           | 30           | 28.9897      | 60                | 61.2981           |
| 37     | 30           | 29.1608      | 20                | 21.2170           | 40           | 38.0773      | 10                | 8.0976            |
| 38     | 30           | 29.3892      | 20                | 19.4860           | 60           | 58.5672      | 20                | 19.9675           |
| 39     | 40           | 39.6461      | 30                | 29.8642           | 10           | 8.6123       | 40                | 38.1669           |
| 40     | 40           | 41.3160      | 40                | 40.4680           | 20           | 20.9568      | 40                | 40.3121           |
| 41     | 40           | 38.3955      | 40                | 39.1952           | 30           | 31.2825      | 50                | 49.7427           |
| 42     | 40           | 38.9084      | 50                | 48.5465           | 40           | 38.4278      | 10                | 9.1989            |

|    |    |         |    |         |    |         |    |         |
|----|----|---------|----|---------|----|---------|----|---------|
| 43 | 50 | 50.6511 | 50 | 51.0455 | 10 | 11.8183 | 20 | 18.1412 |
| 44 | 50 | 51.2583 | 80 | 79.0780 | 20 | 20.4930 | 10 | 11.9851 |
| 45 | 50 | 49.3131 | 10 | 9.7878  | 30 | 29.1095 | 40 | 38.6111 |
| 46 | 50 | 49.7375 | 10 | 11.5449 | 40 | 39.4012 | 70 | 68.1255 |
| 47 | 60 | 61.5110 | 20 | 18.4641 | 10 | 8.0246  | 30 | 29.0034 |
| 48 | 60 | 60.7858 | 40 | 41.0387 | 30 | 29.3523 | 10 | 11.5932 |
| 49 | 70 | 69.2199 | 60 | 58.8937 | 10 | 10.5924 | 20 | 20.6932 |
| 50 | 70 | 71.6846 | 20 | 21.2751 | 20 | 21.5723 | 40 | 41.7957 |
| 51 | 10 | 11.9887 | 30 | 31.4973 | 20 | 18.2915 | 40 | 39.5749 |
| 52 | 10 | 8.5185  | 40 | 41.7478 | 30 | 31.9263 | 20 | 19.7476 |
| 53 | 10 | 8.3610  | 40 | 38.6501 | 60 | 60.7446 | 40 | 39.2393 |
| 54 | 10 | 11.7159 | 80 | 80.7244 | 80 | 78.5673 | 10 | 11.7362 |
| 55 | 20 | 21.5377 | 10 | 11.7896 | 10 | 8.0790  | 30 | 30.3963 |
| 56 | 20 | 19.3707 | 10 | 11.7955 | 20 | 18.9532 | 70 | 69.6161 |
| 57 | 20 | 21.9383 | 10 | 8.1641  | 40 | 41.3864 | 80 | 79.1753 |
| 58 | 20 | 21.1780 | 40 | 38.1278 | 50 | 51.6011 | 40 | 41.4581 |
| 59 | 20 | 21.1204 | 50 | 49.7302 | 60 | 61.3460 | 30 | 28.3712 |
| 60 | 30 | 29.2844 | 60 | 58.5512 | 10 | 10.9710 | 30 | 28.9679 |
| 61 | 30 | 30.6580 | 20 | 18.8920 | 20 | 19.1567 | 50 | 51.4710 |
| 62 | 30 | 29.3495 | 30 | 31.0567 | 30 | 31.6345 | 20 | 19.3789 |
| 63 | 30 | 28.1290 | 30 | 29.5391 | 50 | 50.7854 | 40 | 40.3795 |
| 64 | 30 | 28.8351 | 50 | 50.1405 | 60 | 61.2966 | 30 | 29.3342 |
| 65 | 40 | 38.8729 | 70 | 71.4187 | 30 | 28.3986 | 20 | 19.0626 |
| 66 | 50 | 50.4780 | -- | --      | 10 | 8.4153  | -- | --      |
| 67 | 50 | 51.1962 | -- | --      | 30 | 31.6117 | -- | --      |
| 68 | 50 | 49.2501 | -- | --      | 40 | 39.1264 | -- | --      |
| 69 | 60 | 58.0271 | -- | --      | 10 | 9.9835  | -- | --      |
| 70 | 60 | 61.9539 | -- | --      | 30 | 30.9518 | -- | --      |
| 71 | 70 | 69.2429 | -- | --      | 20 | 20.4016 | -- | --      |
| 72 | 10 | 11.1267 | -- | --      | 10 | 8.4461  | -- | --      |
| 73 | 10 | 10.3173 | -- | --      | 20 | 21.4815 | -- | --      |
| 74 | 10 | 10.7591 | -- | --      | 40 | 38.9719 | -- | --      |
| 75 | 10 | 9.3709  | -- | --      | 50 | 50.1818 | -- | --      |
| 76 | 10 | 8.2703  | -- | --      | 60 | 59.6418 | -- | --      |
| 77 | 10 | 8.9500  | -- | --      | 70 | 69.9559 | -- | --      |
| 78 | 10 | 11.2243 | -- | --      | 80 | 79.5114 | -- | --      |
| 79 | 20 | 20.0719 | -- | --      | 10 | 8.3784  | -- | --      |
| 80 | 20 | 21.6364 | -- | --      | 20 | 18.8305 | -- | --      |
| 81 | 20 | 19.5283 | -- | --      | 30 | 30.6411 | -- | --      |
| 82 | 20 | 21.0335 | -- | --      | 50 | 48.6923 | -- | --      |
| 83 | 20 | 20.0695 | -- | --      | 60 | 61.9814 | -- | --      |
| 84 | 30 | 30.8304 | -- | --      | 10 | 8.3223  | -- | --      |
| 85 | 30 | 28.1732 | -- | --      | 20 | 19.9646 | -- | --      |
| 86 | 30 | 29.7864 | -- | --      | 30 | 29.9472 | -- | --      |
| 87 | 30 | 28.6636 | -- | --      | 50 | 49.4426 | -- | --      |
| 88 | 30 | 31.5229 | -- | --      | 60 | 60.9774 | -- | --      |
| 89 | 40 | 39.6671 | -- | --      | 10 | 11.6294 | -- | --      |
| 90 | 40 | 38.3772 | -- | --      | 30 | 28.7253 | -- | --      |
| 91 | 40 | 41.7863 | -- | --      | 50 | 48.4034 | -- | --      |

|     |    |         |    |    |    |         |    |    |
|-----|----|---------|----|----|----|---------|----|----|
| 92  | 50 | 49.5522 | -- | -- | 20 | 19.1569 | -- | -- |
| 93  | 50 | 48.2923 | -- | -- | 30 | 28.7784 | -- | -- |
| 94  | 50 | 49.6699 | -- | -- | 40 | 39.1717 | -- | -- |
| 95  | 60 | 60.8086 | -- | -- | 10 | 8.9589  | -- | -- |
| 96  | 60 | 61.8379 | -- | -- | 30 | 29.2218 | -- | -- |
| 97  | 70 | 68.6197 | -- | -- | 10 | 10.2220 | -- | -- |
| 98  | 70 | 71.1622 | -- | -- | 20 | 19.7755 | -- | -- |
| 99  | 10 | 11.9833 | -- | -- | 10 | 9.7463  | -- | -- |
| 100 | 10 | 9.2178  | -- | -- | 20 | 18.9860 | -- | -- |
| 101 | 10 | 11.8433 | -- | -- | 40 | 38.8915 | -- | -- |
| 102 | 10 | 9.5824  | -- | -- | 50 | 48.8981 | -- | -- |
| 103 | 10 | 9.0801  | -- | -- | 60 | 59.6738 | -- | -- |
| 104 | 20 | 21.9909 | -- | -- | 10 | 11.6441 | -- | -- |
| 105 | 20 | 20.2017 | -- | -- | 20 | 20.3853 | -- | -- |
| 106 | 20 | 18.3166 | -- | -- | 30 | 30.3065 | -- | -- |
| 107 | 20 | 21.5927 | -- | -- | 40 | 39.8532 | -- | -- |
| 108 | 20 | 19.5936 | -- | -- | 50 | 48.4178 | -- | -- |
| 109 | 20 | 20.6089 | -- | -- | 70 | 71.9668 | -- | -- |
| 110 | 30 | 30.7123 | -- | -- | 10 | 9.7139  | -- | -- |
| 111 | 30 | 30.6192 | -- | -- | 20 | 20.3550 | -- | -- |
| 112 | 30 | 30.9802 | -- | -- | 30 | 30.5635 | -- | -- |
| 113 | 30 | 30.0147 | -- | -- | 40 | 41.7522 | -- | -- |
| 114 | 30 | 30.4214 | -- | -- | 50 | 50.5557 | -- | -- |
| 115 | 30 | 30.8106 | -- | -- | 60 | 61.4438 | -- | -- |
| 116 | 40 | 39.5186 | -- | -- | 10 | 10.8485 | -- | -- |
| 117 | 40 | 40.0941 | -- | -- | 20 | 19.4540 | -- | -- |
| 118 | 40 | 39.7387 | -- | -- | 30 | 30.7504 | -- | -- |
| 119 | 40 | 38.9074 | -- | -- | 50 | 51.9160 | -- | -- |
| 120 | 50 | 51.9027 | -- | -- | 20 | 19.1581 | -- | -- |
| 121 | 50 | 49.3537 | -- | -- | 40 | 41.9858 | -- | -- |
| 122 | 60 | 61.1559 | -- | -- | 20 | 21.1797 | -- | -- |
| 123 | 70 | 70.5295 | -- | -- | 20 | 21.2458 | -- | -- |
| 124 | 80 | 79.7924 | -- | -- | 10 | 11.3225 | -- | -- |
| 125 | 10 | 8.5067  | -- | -- | 10 | 10.0531 | -- | -- |
| 126 | 10 | 10.8637 | -- | -- | 20 | 18.9926 | -- | -- |
| 127 | 10 | 10.1276 | -- | -- | 30 | 29.5288 | -- | -- |
| 128 | 10 | 11.2070 | -- | -- | 40 | 40.6834 | -- | -- |
| 129 | 10 | 11.9314 | -- | -- | 50 | 51.7473 | -- | -- |
| 130 | 10 | 10.3051 | -- | -- | 60 | 58.3207 | -- | -- |
| 131 | 10 | 9.6553  | -- | -- | 70 | 68.7234 | -- | -- |
| 132 | 10 | 11.9825 | -- | -- | 80 | 80.0815 | -- | -- |
| 133 | 20 | 21.5411 | -- | -- | 10 | 10.5930 | -- | -- |
| 134 | 20 | 19.8650 | -- | -- | 20 | 18.3811 | -- | -- |
| 135 | 20 | 21.8713 | -- | -- | 30 | 30.4804 | -- | -- |
| 136 | 20 | 18.6240 | -- | -- | 40 | 39.5935 | -- | -- |
| 137 | 20 | 21.5300 | -- | -- | 60 | 60.1561 | -- | -- |
| 138 | 20 | 20.1747 | -- | -- | 70 | 69.7698 | -- | -- |
| 139 | 30 | 28.7350 | -- | -- | 10 | 8.9969  | -- | -- |
| 140 | 30 | 29.1404 | -- | -- | 30 | 30.1180 | -- | -- |

|     |    |         |    |    |    |         |    |    |
|-----|----|---------|----|----|----|---------|----|----|
| 141 | 30 | 30.2393 | -- | -- | 60 | 59.6606 | -- | -- |
| 142 | 40 | 41.6227 | -- | -- | 10 | 9.2206  | -- | -- |
| 143 | 40 | 40.5991 | -- | -- | 20 | 19.1551 | -- | -- |
| 144 | 40 | 39.0210 | -- | -- | 30 | 29.4327 | -- | -- |
| 145 | 40 | 41.2237 | -- | -- | 50 | 50.1557 | -- | -- |
| 146 | 50 | 50.3603 | -- | -- | 10 | 8.9246  | -- | -- |
| 147 | 50 | 48.4078 | -- | -- | 20 | 20.5786 | -- | -- |
| 148 | 50 | 51.9206 | -- | -- | 40 | 38.4069 | -- | -- |
| 149 | 60 | 58.7515 | -- | -- | 10 | 8.0375  | -- | -- |
| 150 | 60 | 61.3532 | -- | -- | 20 | 19.9254 | -- | -- |
| 151 | 60 | 59.8741 | -- | -- | 30 | 31.6342 | -- | -- |
| 152 | 80 | 79.6686 | -- | -- | 10 | 10.1766 | -- | -- |
